# Supplementary material
Source: publisher figshare collection journal article supplement (https://springernature.figshare.com/ndownloader/files/21417162)
Supplement: Supplementary file [file 21417162]

## Additional file 8: Quality assessment for all included studies.

|                                             |           | External Validity |                                 | Internal Validity  |                             |                                                         | Attrition         |                              |                           | Selection bias/control of confounding |          |                     |                                        |                        |                          |     |
|---------------------------------------------|-----------|-------------------|---------------------------------|--------------------|-----------------------------|---------------------------------------------------------|-------------------|------------------------------|---------------------------|---------------------------------------|----------|---------------------|----------------------------------------|------------------------|--------------------------|-----|
|                                             |           |                   |                                 | Performance        | Detection                   |                                                         |                   |                              |                           |                                       |          |                     |                                        |                        |                          |     |
| Study                                       | Country   | Representative    | <sup>1</sup> Participation rate | Direct observation | PROM -validity/ reliability | <sup>2</sup> Direct observation - validity/ reliability | Blinded assessors | <sup>3</sup> Outcome measure | <sup>1</sup> Completeness | <sup>4</sup> Age                      | Location | <sup>5</sup> Gender | <sup>6</sup> Severity of Joint disease | <sup>7</sup> Follow-up | Single site &/or surgeon | LOE |
| <b>RCTs</b>                                 |           |                   |                                 |                    |                             |                                                         |                   |                              |                           |                                       |          |                     |                                        |                        |                          |     |
| Bennell et al. [131]                        | Australia | ✓                 | ✓                               | ✓                  | ✓                           | NA                                                      | ✓                 | ✓                            | ✗                         | ✗                                     | ✓        | ✗                   | ✓                                      | ✓                      |                          | 2   |
| Mansell et al. [100]                        | USA       | ✓                 | ✓                               | ✓                  | ✓                           | NA                                                      | ✓                 | ✓                            | ✗                         | ✓                                     | ✓        | ✗                   | ✓                                      | ✗                      | YES                      | 2   |
| <b>Prospective Studies, more than 1 arm</b> |           |                   |                                 |                    |                             |                                                         |                   |                              |                           |                                       |          |                     |                                        |                        |                          |     |
| Chaharbakhshi et al [43]                    | USA       | ✗                 | ✓                               | ✓                  | ✗                           | NA                                                      | ✗                 | ✓                            | ✓                         | ✗                                     | ✓        | ✓                   | ✓                                      | ✗                      | YES                      | 3   |
| Domb et al. [58]                            | USA       | ✓                 | ✓                               | ✓                  | ✗                           | NA                                                      | ✗                 | ✓                            | ✓                         | ✗                                     | ✓        | ✓                   | ✓                                      | ✗                      | YES                      | 3   |
| Flores [69]                                 | USA       | ✓                 | ✓                               | ✓                  | ✓                           | NA                                                      | ✗                 | ✓                            | ✓                         | ✗                                     | ✓        | ✓                   | ✓                                      | ✗                      | YES                      | 3   |
| Flores et al. [70]                          | USA       | ✓                 | ✓                               | ✓                  | ✓                           | NA                                                      | ✗                 | ✓                            | ✓                         | ✗                                     | ✓        | ✗                   | ✓                                      | ✗                      | YES                      | 3   |
| Glaws et al. [76]                           | USA       | ✓                 | ✓                               | ✓                  | ✓                           | NA                                                      | ✗                 | ✓                            | ✗                         | ✗                                     | ✓        | ✗                   | ✓                                      | ✗                      | YES                      | 3   |
| Kemp et al. [89]                            | Australia | ✓                 | ✓                               | ✓                  | ✓                           | NA                                                      | ✓                 | ✓                            | ✗                         | ✗                                     | ✓        | ✗                   | ✗                                      | ✗                      | YES                      | 3   |
| Kierkegaard et al.[154]                     | Denmark   | ✓                 | ✓                               | ✓                  | ✓                           | ✓                                                       | ✗                 | ✓                            | ✓                         | ✗                                     | ✓        | ✓                   | ✓                                      | ✗                      | YES                      | 3   |
| Krych et al. [91]                           | USA       | ✓                 | ✓                               | ✓                  | ✓                           | NA                                                      | ✗                 | ✓                            | ✓                         | ✗                                     | ✓        | ✓                   | ✓                                      | ✗                      | YES                      | 3   |
| Newman et al. [104]                         | USA       | ✗                 | ✓                               | ✓                  | ✓                           | NA                                                      | ✗                 | ✓                            | ✓                         | ✓                                     | ✓        | ✓                   | ✓                                      | ✗                      | YES                      | 3   |
| Redmond et al. [113]                        | USA       | ✓                 | ✓                               | ✓                  | ✗                           | NA                                                      | ✗                 | ✓                            | ✓                         | ✗                                     | ✓        | ✗                   | ✗                                      | ✗                      |                          | 3   |
| Redmond et al. [114]                        | USA       | ✗                 | ✓                               | ✓                  | ✗                           | NA                                                      | ✗                 | ✓                            | ✓                         | ✗                                     | ✗        | ✓                   | ✗                                      | ✗                      | YES                      | 3   |
| Thorborg et al. [18]                        | Denmark   | ✓                 | ✓                               | ✓                  | ✓                           | NA                                                      | ✗                 | ✓                            | ✓                         | ✗                                     | ✓        | ✓                   | ✓                                      | ✓                      | YES                      | 3   |
| Zimmerer et al. [130]                       | Germany   | ✓                 | ✓                               | ✓                  | ✓                           | NA                                                      | ✗                 | ✓                            | ✓                         | ✓                                     | ✓        | ✗                   | ✓                                      | ✗                      | YES                      | 3   |
| <b>Prospective, single arm</b>              |           |                   |                                 |                    |                             |                                                         |                   |                              |                           |                                       |          |                     |                                        |                        |                          |     |
| Bennett et al. [42]                         | UK        | ✗                 | ✗                               | ✗                  | ✓                           | NA                                                      | ✗                 | ✓                            | ✓                         | ✓                                     | ✓        | ✓                   | ✗                                      | ✓                      | YES                      | 3   |
| Chahal et al [37]                           | USA       | ✗                 | ✗                               | ✓                  | ✓                           | NA                                                      | ✗                 | ✓                            | ✗                         | ✗                                     | ✓        | ✗                   | ✓                                      | ✗                      | YES                      | 3   |
| Davis et al. [53]                           | USA       | ✗                 | ✗                               | ✓                  | ✓                           | NA                                                      | ✗                 | ✓                            | ✓                         | ✗                                     | ✓        | ✓                   | ✓                                      | ✗                      | YES                      | 3   |
| Domb et al. [63]                            | USA       | ✓                 | ✓                               | ✓                  | ✗                           | NA                                                      | ✗                 | ✓                            | ✓                         | ✗                                     | ✓        | ✗                   | ✓                                      | ✗                      | YES                      | 3   |
| Ishoi et al [17]                            | Denmark   | ✓                 | ✗                               | ✓                  | ✗                           | NA                                                      | ✗                 | ✓                            | ✗                         | ✓                                     | ✓        | ✓                   | ✓                                      | ✗                      |                          | 3   |
| Ohlin et al.[150]                           | Sweden    | ✓                 | ✓                               | ✓                  | ✓                           | NA                                                      | ✗                 | ✓                            | ✗                         | ✗                                     | ✓        | ✗                   | ✓                                      | ✗                      |                          | 3   |
| Philippon [132]                             | USA       | ✓                 | ✓                               | ✓                  | ✓                           | NA                                                      | ✗                 | ✓                            | ✓                         | ✗                                     | ✓        | ✗                   | ✗                                      | ✗                      | YES                      | 4   |
| Sansone et al. [118]                        | Sweden    | ✗                 | ✓                               | ✓                  | ✓                           | NA                                                      | ✗                 | ✓                            | ✓                         | ✗                                     | ✓        | ✗                   | ✗                                      | ✗                      | YES                      | 3   |

|                               |             | External Validity |                                 | Internal Validity  |                             |                                                         |                   | Attrition                    |                           | Selection bias/control of confounding |          |                     |                                        |                        |                          |     |  |
|-------------------------------|-------------|-------------------|---------------------------------|--------------------|-----------------------------|---------------------------------------------------------|-------------------|------------------------------|---------------------------|---------------------------------------|----------|---------------------|----------------------------------------|------------------------|--------------------------|-----|--|
|                               |             |                   |                                 | Performance        | Detection                   |                                                         |                   |                              |                           |                                       |          |                     |                                        |                        |                          |     |  |
| Study                         | Country     | Representative    | <sup>1</sup> Participation rate | Direct observation | PROM -validity/ reliability | <sup>2</sup> Direct observation - validity/ reliability | Blinded assessors | <sup>3</sup> Outcome measure | <sup>1</sup> Completeness | <sup>4</sup> Age                      | Location | <sup>5</sup> Gender | <sup>6</sup> Severity of Joint disease | <sup>7</sup> Follow-up | Single site &/or surgeon | LOE |  |
| Sansone et al. [6]            | Sweden      | ✖                 | ✔                               | ✔                  | ✔                           | NA                                                      | ✖                 | ✔                            | ✖                         | ✖                                     | ✔        | ✖                   | ✔                                      | ✖                      | YES                      | 3   |  |
| Tahoun et al. [123]           | Spain/Egypt | ✖                 | ✖                               | ✔                  | ✖                           | NA                                                      | ✖                 | ✔                            | ✔                         | ✖                                     | ✔        | ✖                   | ✔                                      | ✖                      | YES                      | 4   |  |
| Tijssen et al. [124]          | Netherlands | ✔                 | ✔                               | ✔                  | ✖                           | NA                                                      | ✔                 | ✔                            | ✔                         | ✖                                     | ✔        | ✖                   | ✖                                      | ✖                      | YES                      | 3   |  |
| Retrospective, more than1 arm |             |                   |                                 |                    |                             |                                                         |                   |                              |                           |                                       |          |                     |                                        |                        |                          |     |  |
| Basques et al.[133]           | USA         | ✔                 | ✔                               | ✔                  | ✔                           | NA                                                      | ✖                 | ✔                            | ✔                         | ✖                                     | ✔        | ✖                   | ✔                                      | ✖                      | YES                      | 4   |  |
| Beck et al. [135]             | USA         | ✔                 | ✔                               | ✔                  | ✖                           | NA                                                      | ✖                 | ✔                            | ✔                         | ✖                                     | ✔        | ✔                   | ✔                                      | ✖                      | YES                      | 4   |  |
| Bolia et al.[136]             | USA         | ✔                 | ✔                               | ✔                  | ✖                           | NA                                                      | ✖                 | ✔                            | ✔                         | ✖                                     | ✔        | ✔                   | ✔                                      | ✖                      | YES                      | 4   |  |
| Cancienne et al [137]         | USA         | ✔                 | ✔                               | ✔                  | ✖                           | NA                                                      | ✖                 | ✔                            | ✔                         | ✖                                     | ✔        | ✖                   | ✖                                      | ✖                      | YES                      | 4   |  |
| Chaharbakhshi et al. [138]    | USA         | ✔                 | ✖                               | ✔                  | ✖                           | NA                                                      | ✖                 | ✔                            | ✔                         | ✖                                     | ✔        | ✔                   | ✔                                      | ✖                      | YES                      | 4   |  |
| Chahla et al. [140]           | USA         | ✔                 | ✔                               | ✔                  | ✖                           | NA                                                      | ✖                 | ✔                            | ✔                         | ✖                                     | ✔        | ✖                   | ✔                                      | ✖                      | YES                      | 4   |  |
| Chandrasekaran et al. [142]   | USA         | ✔                 | ✔                               | ✔                  | ✖                           | NA                                                      | ✖                 | ✔                            | ✖                         | ✖                                     | ✔        | ✔                   | ✔                                      | ✖                      | YES                      | 4   |  |
| Chandrasekaran et al. [47]    | USA         | ✖                 | ✔                               | ✔                  | ✖                           | NA                                                      | ✖                 | ✔                            | ✔                         | ✖                                     | ✔        | ✔                   | ✔                                      | ✖                      | YES                      | 4   |  |
| Chandrasekaran et al. [49]    | USA         | ✖                 | ✔                               | ✔                  | ✖                           | NA                                                      | ✖                 | ✔                            | ✖                         | ✖                                     | ✔        | ✖                   | ✔                                      | ✖                      | YES                      | 4   |  |
| Chandrasekaran et al. [44]    | USA         | ✔                 | ✔                               | ✔                  | ✖                           | NA                                                      | ✔                 | ✔                            | ✔                         | ✖                                     | ✔        | ✔                   | ✔                                      | ✖                      | YES                      | 4   |  |
| Chen et al. [50]              | USA         | ✔                 | ✔                               | ✔                  | ✖                           | NA                                                      | ✖                 | ✔                            | ✔                         | ✖                                     | ✔        | ✖                   | ✔                                      | ✖                      | YES                      | 4   |  |
| Clapp et al.[143]             | USA         | ✖                 | ✔                               | ✔                  | ✖                           | NA                                                      | ✖                 | ✔                            | ✖                         | ✖                                     | ✔        | ✔                   | ✔                                      | ✖                      | YES                      | 4   |  |
| Cvetanovich et al [51]        | USA         | ✔                 | ✔                               | ✔                  | ✔                           | NA                                                      | ✖                 | ✔                            | ✔                         | ✖                                     | ✔        | ✖                   | ✔                                      | ✖                      | YES                      | 4   |  |
| Degen et al. [55]             | USA         | ✔                 | ✔                               | ✔                  | ✖                           | NA                                                      | ✖                 | ✔                            | ✔                         | ✔                                     | ✔        | ✔                   | ✖                                      | ✖                      | YES                      | 4   |  |
| Domb et al. [60]              | USA         | ✔                 | ✔                               | ✔                  | ✖                           | NA                                                      | ✖                 | ✔                            | ✖                         | ✖                                     | ✔        | ✖                   | ✔                                      | ✖                      | YES                      | 4   |  |
| Domb et al. [59]              | USA         | ✔                 | ✔                               | ✔                  | ✖                           | NA                                                      | ✖                 | ✔                            | ✔                         | ✖                                     | ✔        | ✔                   | ✔                                      | ✖                      | YES                      | 4   |  |
| Domb et al. [62]              | USA         | ✔                 | ✔                               | ✔                  | ✖                           | NA                                                      | ✖                 | ✔                            | ✔                         | ✖                                     | ✔        | ✔                   | ✔                                      | ✖                      | YES                      | 4   |  |
| Domb et al. [64]              | USA         | ✔                 | ✔                               | ✔                  | ✖                           | NA                                                      | ✖                 | ✔                            | ✔                         | ✖                                     | ✔        | ✔                   | ✔                                      | ✖                      | YES                      | 4   |  |
| Domb et al. [65]              | USA         | ✔                 | ✔                               | ✔                  | ✖                           | NA                                                      | ✖                 | ✔                            | ✔                         | ✖                                     | ✔        | ✖                   | ✔                                      | ✖                      | YES                      | 4   |  |
| Domb et al. [56]              | USA         | ✔                 | ✔                               | ✔                  | ✖                           | NA                                                      | ✖                 | ✔                            | ✔                         | ✖                                     | ✔        | ✔                   | ✔                                      | ✖                      | YES                      | 4   |  |
| Domb et al. [61]              | USA         | ✔                 | ✔                               | ✔                  | ✖                           | NA                                                      | ✖                 | ✔                            | ✔                         | ✖                                     | ✔        | ✔                   | ✔                                      | ✖                      | YES                      | 4   |  |
| Fabricant et al [68]          | USA         | ✔                 | ✔                               | ✔                  | ✖                           | NA                                                      | ✖                 | ✖                            | ✔                         | ✖                                     | ✔        | ✔                   | ✔                                      | ✖                      | YES                      | 4   |  |

|                            |         | External Validity |                                 | Internal Validity  |                             |                                                         |                   | Attrition                    |                           | Selection bias/control of confounding |          |                     |                                        |                        |                          |     |
|----------------------------|---------|-------------------|---------------------------------|--------------------|-----------------------------|---------------------------------------------------------|-------------------|------------------------------|---------------------------|---------------------------------------|----------|---------------------|----------------------------------------|------------------------|--------------------------|-----|
|                            |         |                   |                                 | Performance        | Detection                   |                                                         |                   |                              |                           |                                       |          |                     |                                        |                        |                          |     |
| Study                      | Country | Representative    | <sup>1</sup> Participation rate | Direct observation | PROM -validity/ reliability | <sup>2</sup> Direct observation - validity/ reliability | Blinded assessors | <sup>3</sup> Outcome measure | <sup>1</sup> Completeness | <sup>4</sup> Age                      | Location | <sup>5</sup> Gender | <sup>6</sup> Severity of Joint disease | <sup>7</sup> Follow-up | Single site &/or surgeon | LOE |
| Frank et al. [144]         | USA     | ✗                 | ✓                               | ✓                  | ✗                           | NA                                                      | ✗                 | ✓                            | ✗                         | ✗                                     | ✓        | ✓                   | ✓                                      | ✗                      | YES                      | 4   |
| Frank et al. [71]          | USA     | ✓                 | ✓                               | ✓                  | ✗                           | NA                                                      | ✗                 | ✓                            | ✓                         | ✗                                     | ✓        | ✓                   | ✗                                      | ✓                      | YES                      | 4   |
| Frank et al. [72]          | USA     | ✗                 | ✗                               | ✓                  | ✗                           | NA                                                      | ✗                 | ✓                            | ✓                         | ✗                                     | ✓        | ✓                   | ✗                                      | ✗                      | YES                      | 4   |
| Gupta et al. [77]          | USA     | ✓                 | ✓                               | ✓                  | ✗                           | NA                                                      | ✗                 | ✓                            | ✓                         | ✗                                     | ✓        | ✓                   | ✓                                      | ✗                      | YES                      | 4   |
| Hartigan et al. [79]       | USA     | ✓                 | ✓                               | ✓                  | ✗                           | NA                                                      | ✗                 | ✓                            | ✓                         | ✗                                     | ✓        | ✓                   | ✓                                      | ✗                      | YES                      | 4   |
| Hartigan et al. [80]       | USA     | ✓                 | ✓                               | ✓                  | ✗                           | NA                                                      | ✗                 | ✓                            | ✓                         | ✗                                     | ✓        | ✓                   | ✓                                      | ✗                      | YES                      | 4   |
| Hassebrock et al. [145]    | USA     | ✓                 | ✓                               | ✓                  | ✗                           | NA                                                      | ✗                 | ✓                            | ✓                         | ✓                                     | ✓        | ✗                   | ✓                                      | ✗                      | YES                      | 4   |
| Hevesi et al [146]         | USA     | ✓                 | ✓                               | ✓                  | ✗                           | NA                                                      | ✗                 | ✓                            | ✓                         | ✗                                     | ✓        | ✗                   | ✓                                      | ✗                      |                          | 4   |
| Hevesi et al [83]          | USA     | ✓                 | ✓                               | ✓                  | ✗                           | NA                                                      | ✗                 | ✓                            | ✓                         | ✗                                     | ✓        | ✓                   | ✓                                      | ✗                      |                          | 4   |
| Jackson et al. [86]        | USA     | ✓                 | ✓                               | ✓                  | ✗                           | NA                                                      | ✗                 | ✓                            | ✓                         | ✗                                     | ✓        | ✗                   | ✗                                      | ✗                      | YES                      | 4   |
| Jackson et al. [87]        | USA     | ✓                 | ✓                               | ✓                  | ✗                           | NA                                                      | ✗                 | ✓                            | ✓                         | ✗                                     | ✓        | ✗                   | ✗                                      | ✗                      | YES                      | 4   |
| Krishnamoorthy et al.[147] | USA     | ✓                 | ✓                               | ✓                  | ✗                           | NA                                                      | ✗                 | ✓                            | ✗                         | ✗                                     | ✓        | ✓                   | ✓                                      | ✗                      | YES                      | 4   |
| Kuhns et al. [92]          | USA     | ✓                 | ✓                               | ✓                  | ✗                           | NA                                                      | ✗                 | ✓                            | ✓                         | ✗                                     | ✓        | ✓                   | ✓                                      | ✗                      | YES                      | 4   |
| Kunze et al.[148]          | USA     | ✓                 | ✓                               | ✓                  | ✗                           | NA                                                      | ✗                 | ✓                            | ✓                         | ✗                                     | ✓        | ✗                   | ✓                                      | ✗                      | YES                      | 4   |
| Levy et al. [94]           | USA     | ✓                 | ✓                               | ✓                  | ✗                           | NA                                                      | ✗                 | ✓                            | ✓                         | ✗                                     | ✗        | ✓                   | ✗                                      | ✗                      | YES                      | 4   |
| Locks et al. [96]          | USA     | ✓                 | ✓                               | ✓                  | ✗                           | NA                                                      | ✗                 | ✓                            | ✓                         | ✗                                     | ✓        | ✓                   | ✓                                      | ✓                      | YES                      | 4   |
| Lodhia et al. [97]         | USA     | ✗                 | ✓                               | ✓                  | ✗                           | NA                                                      | ✗                 | ✓                            | ✗                         | ✗                                     | ✓        | ✓                   | ✓                                      | ✗                      | YES                      | 4   |
| Lodhia et al. [98]         | USA     | ✓                 | ✗                               | ✓                  | ✗                           | NA                                                      | ✗                 | ✓                            | ✓                         | ✗                                     | ✓        | ✓                   | ✓                                      | ✗                      | YES                      | 4   |
| Nawabi et al. [103]        | USA     | ✗                 | ✓                               | ✓                  | ✗                           | NA                                                      | ✗                 | ✓                            | ✓                         | ✗                                     | ✓        | ✓                   | ✗                                      | ✗                      | YES                      | 4   |
| Perets et al. [108]        | USA     | ✓                 | ✓                               | ✓                  | ✗                           | NA                                                      | ✗                 | ✓                            | ✗                         | ✗                                     | ✓        | ✗                   | ✓                                      | ✗                      | YES                      | 4   |
| Perets et al. [110]        | USA     | ✓                 | ✓                               | ✓                  | ✗                           | NA                                                      | ✗                 | ✓                            | ✗                         | ✗                                     | ✓        | ✓                   | ✓                                      | ✗                      | YES                      | 4   |
| Perets et al. [107]        | USA     | ✓                 | ✓                               | ✓                  | ✗                           | NA                                                      | ✗                 | ✗                            | ✓                         | ✓                                     | ✓        | ✓                   | ✓                                      | ✗                      | YES                      | 4   |
| Saltzman et al. [117]      | USA     | ✗                 | ✓                               | ✓                  | ✗                           | NA                                                      | ✗                 | ✓                            | ✓                         | ✗                                     | ✓        | ✗                   | ✓                                      | ✗                      | YES                      | 4   |
| Sawyer et al. [119]        | USA     | ✓                 | ✓                               | ✓                  | ✗                           | NA                                                      | ✗                 | ✓                            | ✓                         | ✗                                     | ✓        | ✓                   | ✓                                      | ✗                      | YES                      | 4   |
| Stake et al. [121]         | USA     | ✗                 | ✓                               | ✓                  | ✗                           | NA                                                      | ✗                 | ✗                            | ✗                         | ✗                                     | ✓        | ✓                   | ✓                                      | ✗                      | YES                      | 4   |

|                            |         | External Validity |                                 | Internal Validity  |                             |                                                         |                   | Attrition                    |                           | Selection bias/control of confounding |          |                     |                                        |                        |     | Single site &/or surgeon | LOE |
|----------------------------|---------|-------------------|---------------------------------|--------------------|-----------------------------|---------------------------------------------------------|-------------------|------------------------------|---------------------------|---------------------------------------|----------|---------------------|----------------------------------------|------------------------|-----|--------------------------|-----|
|                            |         |                   |                                 | Performance        | Detection                   |                                                         |                   |                              |                           |                                       |          |                     |                                        |                        |     |                          |     |
| Study                      | Country | Representative    | <sup>1</sup> Participation rate | Direct observation | PROM -validity/ reliability | <sup>2</sup> Direct observation - validity/ reliability | Blinded assessors | <sup>3</sup> Outcome measure | <sup>1</sup> Completeness | <sup>4</sup> Age                      | Location | <sup>5</sup> Gender | <sup>6</sup> Severity of Joint disease | <sup>7</sup> Follow-up |     |                          |     |
| Stone et al. [152]         | USA     | ✗                 | ✓                               | ✓                  | ✗                           | NA                                                      | ✗                 | ✓                            | ✓                         | ✗                                     | ✓        | ✓                   | ✓                                      | ✗                      | YES | 4                        |     |
| Suarez-Ahedo et al. [122]  | USA     | ✓                 | ✓                               | ✓                  | ✗                           | NA                                                      | ✗                 | ✓                            | ✓                         | ✗                                     | ✓        | ✓                   | ✓                                      | ✗                      | YES | 4                        |     |
| Vap et al. [125]           | USA     | ✗                 | ✓                               | ✓                  | ✗                           | NA                                                      | ✗                 | ✓                            | ✓                         | ✗                                     | ✓        | ✓                   | ✗                                      | ✗                      | YES | 4                        |     |
| Weber et al. [127]         | USA     | ✓                 | ✓                               | ✓                  | ✗                           | NA                                                      | ✗                 | ✓                            | ✓                         | ✗                                     | ✓        | ✓                   | ✓                                      | ✗                      | YES | 4                        |     |
| Wu et al. [128]            | China   | ✗                 | ✗                               | ✓                  | ✗                           | NA                                                      | ✗                 | ✓                            | ✗                         | ✗                                     | ✓        | ✓                   | ✓                                      | ✗                      | YES | 4                        |     |
| Yoo et al. [129]           | Korea   | ✗                 | ✗                               | ✓                  | ✗                           | NA                                                      | ✗                 | ✓                            | ✓                         | ✓                                     | ✓        | ✓                   | ✓                                      | ✗                      | YES | 4                        |     |
| Retrospective, single arm  |         |                   |                                 |                    |                             |                                                         |                   |                              |                           |                                       |          |                     |                                        |                        |     |                          |     |
| Barastegui et al. [40]     | Spain   | ✗                 | ✓                               | ✓                  | ✗                           | NA                                                      | ✗                 | ✓                            | ✓                         | ✗                                     | ✓        | ✗                   | ✗                                      | ✗                      | YES |                          |     |
| Bayley et al. [41]         | Canada  | ✓                 | ✓                               | ✓                  | ✗                           | NA                                                      | ✗                 | ✗                            | ✓                         | ✗                                     | ✓        | ✗                   | ✓                                      | ✗                      | YES | 4                        |     |
| Beck et al. [134]          | USA     | ✓                 | ✓                               | ✓                  | ✗                           | NA                                                      | ✗                 | ✓                            | ✓                         | ✗                                     | ✓        | ✗                   | ✓                                      | ✗                      | YES | 4                        |     |
| Chahla et al. [139]        | USA     | ✓                 | ✓                               | ✓                  | ✗                           | NA                                                      | ✗                 | ✓                            | ✓                         | ✗                                     | ✓        | ✗                   | ✓                                      | ✗                      | YES | 4                        |     |
| Chambers et al. [141]      | USA     | ✓                 | ✓                               | ✓                  | ✓                           | NA                                                      | ✗                 | ✓                            | ✓                         | ✗                                     | ✓        | ✓                   | ✓                                      | ✗                      | YES | 4                        |     |
| Chandrasekaran et al. [45] | USA     | ✗                 | ✓                               | ✓                  | ✗                           | NA                                                      | ✗                 | ✓                            | ✓                         | ✗                                     | ✓        | ✗                   | ✓                                      | ✗                      | YES | 4                        |     |
| Chandrasekaran et al. [46] | USA     | ✓                 | ✓                               | ✓                  | ✗                           | NA                                                      | ✗                 | ✓                            | ✓                         | ✗                                     | ✓        | ✗                   | ✓                                      | ✗                      | YES | 4                        |     |
| Chandrasekaran et al. [48] | USA     | ✗                 | ✓                               | ✓                  | ✗                           | NA                                                      | ✗                 | ✓                            | ✓                         | ✗                                     | ✓        | ✗                   | ✓                                      | ✗                      | YES | 4                        |     |
| Cvetanovich et al. [52]    | USA     | ✓                 | ✓                               | ✓                  | ✓                           | NA                                                      | ✓                 | ✓                            | ✓                         | ✗                                     | ✓        | ✗                   | ✓                                      | ✗                      | YES | 4                        |     |
| Degen [54]                 | USA     | ✓                 | ✓                               | ✗                  | ✗                           | NA                                                      | ✗                 | ✓                            | ✗                         | ✗                                     | ✓        | ✗                   | ✓                                      | ✗                      | YES | 4                        |     |
| Domb et al. [57]           | USA     | ✓                 | ✓                               | ✓                  | ✗                           | NA                                                      | ✗                 | ✓                            | ✓                         | ✗                                     | ✓        | ✗                   | ✓                                      | ✗                      | YES | 4                        |     |
| Domb et al. [66]           | USA     | ✓                 | ✓                               | ✓                  | ✗                           | NA                                                      | ✗                 | ✓                            | ✓                         | ✗                                     | ✓        | ✗                   | ✓                                      | ✗                      | YES | 4                        |     |
| Domb et al. [67]           | USA     | ✓                 | ✓                               | ✓                  | ✗                           | NA                                                      | ✗                 | ✓                            | ✓                         | ✗                                     | ✓        | ✗                   | ✓                                      | ✗                      | YES | 4                        |     |
| Flores et al. [35]         | USA     | ✓                 | ✓                               | ✓                  | ✓                           | NA                                                      | ✗                 | ✓                            | ✗                         | ✗                                     | ✓        | ✓                   | ✓                                      | ✗                      | YES | 4                        |     |
| Frank et al [73]           | USA     | ✓                 | ✓                               | ✓                  | ✗                           | NA                                                      | ✗                 | ✓                            | ✓                         | ✗                                     | ✓        | ✗                   | ✓                                      | ✗                      | YES | 4                        |     |
| Frank et al.[74]           | USA     | ✓                 | ✓                               | ✓                  | ✗                           | NA                                                      | ✗                 | ✓                            | ✓                         | ✗                                     | ✓        | ✗                   | ✓                                      | ✗                      | YES | 4                        |     |
| Frank et al. [75]          | USA     | ✓                 | ✓                               | ✓                  | ✗                           | NA                                                      | ✗                 | ✓                            | ✓                         | ✗                                     | ✓        | ✗                   | ✓                                      | ✗                      | YES | 4                        |     |
| Gupta et al [78]           | USA     | ✓                 | ✓                               | ✓                  | ✗                           | NA                                                      | ✗                 | ✓                            | ✓                         | ✗                                     | ✓        | ✗                   | ✓                                      | ✗                      | YES | 4                        |     |
| Hartigan et al. [82]       | USA     | ✓                 | ✓                               | ✓                  | ✓                           | NA                                                      | ✗                 | ✓                            | ✓                         | ✗                                     | ✓        | ✗                   | ✓                                      | ✗                      | YES | 4                        |     |
| Hartigan et al. [81]       | USA     | ✓                 | ✓                               | ✓                  | ✗                           | NA                                                      | ✗                 | ✓                            | ✓                         | ✗                                     | ✓        | ✗                   | ✓                                      | ✗                      | YES | 4                        |     |

|                           |           | External Validity |                                 | Internal Validity  |                             |                                                         |                   | Attrition                    |                           | Selection bias/control of confounding |          |                     |                                        |                        | Single site &/or surgeon | LOE |
|---------------------------|-----------|-------------------|---------------------------------|--------------------|-----------------------------|---------------------------------------------------------|-------------------|------------------------------|---------------------------|---------------------------------------|----------|---------------------|----------------------------------------|------------------------|--------------------------|-----|
|                           |           | Representative    | <sup>1</sup> Participation rate | Performance        | Detection                   | <sup>2</sup> Direct observation - validity/ reliability | Blinded assessors | <sup>3</sup> Outcome measure | <sup>1</sup> Completeness | <sup>4</sup> Age                      | Location | <sup>5</sup> Gender | <sup>6</sup> Severity of Joint disease | <sup>7</sup> Follow-up |                          |     |
| Study                     | Country   |                   |                                 | Direct observation | PROM -validity/ reliability |                                                         |                   |                              |                           |                                       |          |                     |                                        |                        |                          |     |
| Hevesi et al. [84]        | USA       | ✓                 | ✓                               | ✓                  | ✗                           | NA                                                      | ✗                 | ✓                            | ✓                         | ✗                                     | ✗        | ✗                   | ✓                                      | ✗                      |                          | 4   |
| Ibrahim et al. [85]       | Canada    | ✓                 | ✓                               | ✓                  | ✗                           | NA                                                      | ✗                 | ✓                            | ✓                         | ✗                                     | ✓        | ✗                   | ✓                                      | ✗                      | YES                      | 4   |
| Kang et al.[88]           | Korea     | ✓                 | ✓                               | ✓                  | ✗                           | NA                                                      | ✗                 | ✓                            | ✓                         | ✗                                     | ✓        | ✗                   | ✗                                      | ✗                      | YES                      | 4   |
| Klingenstein et al. [90]  | USA       | ✓                 | ✓                               | ✓                  | ✗                           | NA                                                      | ✗                 | ✓                            | ✗                         | ✗                                     | ✓        | ✗                   | ✓                                      | ✗                      | YES                      | 4   |
| Lansdown et al. [93]      | USA       | ✓                 | ✓                               | ✓                  | ✗                           | NA                                                      | ✗                 | ✓                            | ✗                         | ✗                                     | ✓        | ✗                   | ✓                                      | ✗                      | YES                      | 4   |
| Lee et al.[149]           | Korea     | ✗                 | ✓                               | ✓                  | ✗                           | NA                                                      | ✗                 | ✓                            | ✓                         | ✗                                     | ✓        | ✓                   | ✓                                      | ✗                      |                          | 4   |
| Levy et al. [95]          | USA       | ✓                 | ✓                               | ✓                  | ✗                           | NA                                                      | ✗                 | ✓                            | ✓                         | ✗                                     | ✓        | ✓                   | ✓                                      | ✗                      | YES                      | 4   |
| Lund et al. [99]          | Denmark   | ✓                 | ✗                               | ✓                  | ✓                           | NA                                                      | ✗                 | ✓                            | ✗                         | ✗                                     | ✓        | ✓                   | ✓                                      | ✗                      |                          | 4   |
| Más Martínez et al. [101] | Spain     | ✓                 | ✓                               | ✓                  | ✗                           | NA                                                      | ✗                 | ✓                            | ✓                         | ✓                                     | ✓        | ✓                   | ✓                                      | ✗                      | YES                      | 4   |
| Michal et al. [102]       | Israel    | ✗                 | ✓                               | ✓                  | ✗                           | NA                                                      | ✗                 | ✓                            | ✓                         | ✗                                     | ✓        | ✓                   | ✓                                      | ✗                      | YES                      | 4   |
| Nwachukwu et al. [105]    | USA       | ✓                 | ✓                               | ✓                  | ✗                           | NA                                                      | ✗                 | ✓                            | ✓                         | ✗                                     | ✓        | ✗                   | ✗                                      | ✗                      | YES                      | 4   |
| Ortiz-Declet et al. [106] | USA       | ✗                 | ✓                               | ✓                  | ✗                           | NA                                                      | ✗                 | ✓                            | ✓                         | ✗                                     | ✓        | ✗                   | ✓                                      | ✗                      | YES                      | 4   |
| Perets et al. [109]       | USA       | ✗                 | ✓                               | ✓                  | ✗                           | NA                                                      | ✗                 | ✓                            | ✓                         | ✗                                     | ✓        | ✗                   | ✓                                      | ✗                      | YES                      | 4   |
| Perets et al. [111]       | USA       | ✗                 | ✓                               | ✓                  | ✗                           | NA                                                      | ✗                 | ✓                            | ✓                         | ✗                                     | ✓        | ✗                   | ✓                                      | ✗                      | YES                      | 4   |
| Pergaminelis et al. [112] | Australia | ✓                 | ✓                               | ✓                  | ✓                           | NA                                                      | ✗                 | ✓                            | ✓                         | ✗                                     | ✓        | ✗                   | ✗                                      | ✗                      |                          | 4   |
| Rhee et al. [115]         | Canada    | ✗                 | ✓                               | ✓                  | ✗                           | NA                                                      | ✗                 | ✓                            | ✓                         | ✗                                     | ✓        | ✗                   | ✗                                      | ✗                      | YES                      | 4   |
| Riff et al. [116]         | USA       | ✓                 | ✓                               | ✓                  | ✗                           | NA                                                      | ✗                 | ✓                            | ✓                         | ✓                                     | ✓        | ✗                   | ✓                                      | ✗                      | YES                      | 4   |
| Shaw et al. [120]         | USA       | ✓                 | ✓                               | ✓                  | ✗                           | NA                                                      | ✗                 | ✓                            | ✓                         | ✓                                     | ✓        | ✗                   | ✗                                      | ✗                      | YES                      | 4   |
| Stone et al. [151]        | USA       | ✓                 | ✓                               | ✓                  | ✗                           | NA                                                      | ✗                 | ✓                            | ✓                         | ✗                                     | ✓        | ✗                   | ✓                                      | ✗                      | YES                      | 4   |
| Ukwuani et al [153]       | USA       | ✓                 | ✓                               | ✓                  | ✗                           | NA                                                      | ✗                 | ✓                            | ✗                         | ✗                                     | ✓        | ✗                   | ✓                                      | ✗                      | YES                      | 4   |
| Waterman et al. [126]     | USA       | ✓                 | ✓                               | ✓                  | ✗                           | NA                                                      | ✗                 | ✓                            | ✓                         | ✗                                     | ✓        | ✗                   | ✓                                      | ✗                      | YES                      | 4   |

✓ indicates the measure was adequately addressed in the study. ✗ indicates the measure was not adequately addressed in the study.

<sup>1</sup>✓ percent participation/ completion was 80% or more

<sup>2</sup>NA indicates no direct measure of PA used

<sup>3</sup>✓ indicates same method of ascertainment was used for all participants

<sup>4</sup>✓ if **range** within 18-50. ✗ if range is outside 18-50 and not adjusted for in analysis or insufficient information

<sup>5</sup>✓ if gender is balanced (10% or less difference) or adjusted for in analysis; ✗ >10% difference not adjusted for in analysis or unknown

<sup>6</sup>✓ if severity of OA identified in the study

|                   |         |                |                                 | Internal Validity  |                             |                                                         |                   |                              |                           |                  |                                       |                     |                                        |                        |                          |     |
|-------------------|---------|----------------|---------------------------------|--------------------|-----------------------------|---------------------------------------------------------|-------------------|------------------------------|---------------------------|------------------|---------------------------------------|---------------------|----------------------------------------|------------------------|--------------------------|-----|
| External Validity |         |                |                                 | Performance        |                             | Detection                                               |                   | Attrition                    |                           |                  | Selection bias/control of confounding |                     |                                        |                        |                          |     |
| Study             | Country | Representative | <sup>1</sup> Participation rate | Direct observation | PROM -validity/ reliability | <sup>2</sup> Direct observation - validity/ reliability | Blinded assessors | <sup>3</sup> Outcome measure | <sup>1</sup> Completeness | <sup>4</sup> Age | Location                              | <sup>5</sup> Gender | <sup>6</sup> Severity of Joint disease | <sup>7</sup> Follow-up | Single site &/or surgeon | LOE |
|                   |         |                |                                 |                    |                             |                                                         |                   |                              |                           |                  |                                       |                     |                                        |                        |                          |     |

<sup>7</sup>✓ where FU is the same for all study participants or lies within 10% i.e. the following acceptable ranges – 1 year follow-up, 1 month each way; 2 years follow-up = 2 months; 3 years follow-up = 3months.....10 years = 10 months;  
✗ differences in follow-up are >10% or unaccounted for in analysis

LOE=Level of evidence (Oxford Centre for Evidence-Based Medicine [29]); PROM=patient-reported outcome measure.
